# Supplementary material
Source: MDPI journal article supplement (https://www.mdpi.com/2571-905X/5/4/70)
Supplement: s1 [file s1]

# Supplemental Material for Closed Form Bayesian Inferences for Binary Logistic Regression with Applications to American Voter Turnout

Kevin D. Dayaratna<sup>\*</sup>

Jesse M. Crosson<sup>†</sup>

Chandler Hubbard<sup>§</sup>

November 16, 2022

## Abstract

This supplemental material section contains simulation results and more detailed analysis regarding the results presented in “Closed Form Bayesian Inferences for Binary Logistic Regression with Applications to American Voter Turnout.”

## 1 Numerical Simulations to Test Parameter Recovery

In this section, we illustrate the efficacy of our method by performing a series of numerical simulations. In particular, we conducted a series of simulations for  $p = 2, 3$ , and 4 attributes, allowing  $I = 1000$ ,  $JN_i = 1$ , and 300 terms in the series expansion (i.e. 1000 households, 1 category, and 1 occasion). These simulations

---

<sup>\*</sup>Center for Data Analysis, The Heritage Foundation, kevin.dayaratna@heritage.org

<sup>†</sup>This manuscript is based on a chapter of the first author’s doctoral dissertation [1]

<sup>‡</sup>Purdue University, Department of Political Science

<sup>§</sup>University of Wyoming, Department of Economics

are a subset of a larger number of simulations conducted that is available upon request. For each vector of parameters  $(\mu_1, \dots, \mu_P, \dots, \sigma_1^2, \dots, \sigma_P^2)$ , we performed 25 simulations. For each such simulate, we simulated  $I = 1000$  values of  $(x_{i,1}, \dots, x_{i,P})$ , rescaled them by dividing by a constant to allow for sufficient 0/1 variation of  $y_i$ , numerically approximated  $P(Y|\Omega)$  via Equation 21, and maximized the resulting marginal likelihood as a function of  $\Omega$ .<sup>1</sup>

These simulations were run using MATLAB on an AMD 2.2 GHz Triple Core Processor with 8 GB of RAM. Our results are summarized in Tables S1-S9, consisting of the true values of  $(\mu_1, \dots, \mu_P, \dots, \sigma_1^2, \dots, \sigma_P^2)$ , the mean and standard deviation of each of these values, and the corresponding t-statistics. The simulations corresponding to  $p = 4$  attributes is split up into several tables (Tables S5-S9) due to space constraints. In order to determine whether the values were in numerical correspondence with the true values, we conducted t-tests for each of the parameters. This resulted in comparing the computed t-statistics to a t-distribution with 24 degrees of freedom, as a result of performing 25 simulations for each set of parameter estimates. After instituting conservative but commonly accepted Bonferroni corrections, we used critical values of 3.791 for  $p = 2$  attributes, 4.051 for  $p = 3$  attributes, and 4.244 for  $p = 4$  attributes to compare the calculated t-statistics against. All of our values are well below these critical values. These significance tests therefore do not suggest any meaningful disparity between the estimated parameter values and the true values. As these runs were based on simulated data from a plethora of normal distributions, these simulations demonstrate the strong accuracy of our polynomial approximations as well as the efficacy of our new technique. Additionally, the final few terms of the tails of the truncated series approximations were essentially zero (according to MATLAB output) for a variety of choices of truncation levels. This fact suggested that, at least for these simulations, the truncated series expansions based on 300 terms were reasonable approximations to the marginalized likelihood.

---

<sup>1</sup>The judgment about the magnitude of this constant can easily be made by looking at the consequences of choices on the intermediary output in common statistical computing packages.

Table S1: Numerical Simulations for  $P = 2$  attributes

| $(\mu_1, \mu_2)$ | $(\sigma_1^2, \sigma_2^2)$ | $(\bar{\mu}_1, \bar{\mu}_2)$ | $(\bar{\sigma}_1^2, \bar{\sigma}_2^2)$ | $(\sigma_{\mu_1}, \sigma_{\mu_2})$ | $(\sigma_{\sigma_1^2}, \sigma_{\sigma_2^2})$ |
|------------------|----------------------------|------------------------------|----------------------------------------|------------------------------------|----------------------------------------------|
| (-8, -3)         | (3, 8)                     | (-7.970, -2.972)             | (2.556, 7.658)                         | (1.581, 1.417)                     | (1.195, 1.387)                               |
| (-4, -14)        | (5, 6)                     | (-3.728, -14.175)            | (4.772, 6.511)                         | (1.188, 1.236)                     | (1.273, 1.037)                               |
| (-7, -5)         | (5, 3)                     | (-7.300, -5.078)             | (4.691, 2.710)                         | (1.434, 1.426)                     | (1.582, 1.366)                               |
| (5, -4)          | (4, 5)                     | (4.865, -3.842)              | (4.265, 5.239)                         | (1.001, 1.210)                     | (1.432, 1.150)                               |
| (-5, 4)          | (4, 5)                     | (-4.801, 4.123)              | (4.385, 5.072)                         | (1.408, 1.318)                     | (1.252, 1.252)                               |
| (5, 4)           | (4, 5)                     | (5.062, 3.893)               | (4.429, 5.312)                         | (1.377, 1.279)                     | (1.441, 1.086)                               |
| (8, -3)          | (3, 8)                     | (8.069, -3.232)              | (2.771, 8.290)                         | (1.742, 1.816)                     | (0.969, 0.636)                               |
| (-8, 3)          | (3, 8)                     | (-7.601, 2.904)              | (2.942, 8.389)                         | (1.587, 1.414)                     | (0.745, 0.885)                               |
| (8, 3)           | (3, 8)                     | (8.182, 2.970)               | (2.173, 8.484)                         | (1.329, 1.362)                     | (1.387, 1.873)                               |
| (4, -14)         | (5, 6)                     | (3.779, -14.461)             | (5.259, 5.584)                         | (1.077, 1.353)                     | (1.242, 1.303)                               |
| (-4, 14)         | (5, 6)                     | (-3.945, 13.877)             | (5.167, 5.557)                         | (0.945, 1.135)                     | (1.088, 1.012)                               |
| (7, -5)          | (5, 3)                     | (7.061, -4.359)              | (5.005, 3.416)                         | (1.253, 1.111)                     | (1.686, 1.374)                               |
| (-7, 5)          | (5, 3)                     | (-7.666, 5.115)              | (4.806, 2.929)                         | (1.036, 1.319)                     | (1.344, 1.542)                               |
| (7, 5)           | (5, 3)                     | (7.327, 4.565)               | (4.786, 2.678)                         | (1.410, 1.240)                     | (0.858, 1.323)                               |

Table S2: t-statistics for  $P = 2$  attributes

| $(\mu_1, \mu_2)$ | $(\sigma_1^2, \sigma_2^2)$ | t-stat ( $\mu_1$ ) | t-stat ( $\mu_2$ ) | t-stat ( $\sigma_1^2$ ) | t-stat ( $\sigma_2^2$ ) |
|------------------|----------------------------|--------------------|--------------------|-------------------------|-------------------------|
| (-8, -3)         | (3, 8)                     | 0.095              | 0.098              | 1.859                   | 1.232                   |
| (-4, -14)        | (5, 6)                     | 1.147              | -0.708             | 0.897                   | -2.461                  |
| (-7, -5)         | (5, 3)                     | -1.047             | -0.272             | 0.976                   | 1.063                   |
| (5, -4)          | (4, 5)                     | -0.672             | 0.652              | -0.924                  | -1.040                  |
| (-5, 4)          | (4, 5)                     | 0.706              | 0.466              | -1.538                  | -0.289                  |
| (5, 4)           | (4, 5)                     | 0.224              | -0.418             | -1.490                  | -1.437                  |
| (8, -3)          | (3, 8)                     | 0.197              | -0.640             | 1.180                   | -2.275                  |
| (-8, 3)          | (3, 8)                     | 1.257              | -0.339             | 0.392                   | -2.201                  |
| (8, 3)           | (3, 8)                     | -0.683             | 0.111              | 2.981                   | -1.291                  |
| (4, -14)         | (5, 6)                     | -1.025             | -1.704             | -1.042                  | 1.597                   |
| (-4, 14)         | (5, 6)                     | 0.292              | -0.542             | -0.765                  | 2.187                   |
| (7, -5)          | (5, 3)                     | 0.242              | 2.887              | -0.013                  | -1.514                  |
| (-7, 5)          | (5, 3)                     | -3.212             | 0.435              | 0.723                   | 0.230                   |
| (7, 5)           | (5, 3)                     | 1.159              | -1.756             | 1.246                   | 1.216                   |

Table S3: Numerical Simulations for  $P = 3$  attributes

| $(\mu_1, \mu_2, \mu_3)$ | $(\sigma_1^2, \sigma_2^2, \sigma_3^2)$ | $(\bar{\mu}_1, \bar{\mu}_2, \bar{\mu}_3)$ | $(\bar{\sigma}_1^2, \bar{\sigma}_2^2, \bar{\sigma}_3^2)$ | $(\sigma_{\mu_1}, \sigma_{\mu_2}, \sigma_{\mu_3})$ | $(\sigma_{\sigma_1}, \sigma_{\sigma_2}, \sigma_{\sigma_3})$ |
|-------------------------|----------------------------------------|-------------------------------------------|----------------------------------------------------------|----------------------------------------------------|-------------------------------------------------------------|
| (-5, -6, -7)            | (3, 4, 3)                              | (-5.010, -6.298, -6.883)                  | (3.268, 3.973, 3.232)                                    | (1.591, 1.453, 1.704)                              | (1.037, 1.091, 0.941)                                       |
| (5, -6, -7)             | (3, 4, 3)                              | (5.030, -5.690, -7.658)                   | (3.028, 4.098, 2.679)                                    | (1.788, 1.897, 1.382)                              | (1.397, 1.128, 1.357)                                       |
| (-5, 6, -7)             | (3, 4, 3)                              | (-5.283, 6.043, -6.691)                   | (2.685, 3.947, 3.189)                                    | (1.159, 1.369, 1.617)                              | (1.288, 0.748, 0.923)                                       |
| (-5, -6, 7)             | (3, 4, 3)                              | (-4.803, -5.962, 7.247)                   | (2.930, 4.096, 2.885)                                    | (1.242, 1.541, 1.396)                              | (1.250, 0.882, 1.139)                                       |
| (5, -6, 7)              | (3, 4, 3)                              | (4.745, -5.889, 7.093)                    | (3.130, 3.925, 3.263)                                    | (1.295, 1.600, 1.501)                              | (1.054, 1.038, 0.766)                                       |
| (5, 6, 7)               | (3, 4, 4)                              | (4.964, 6.290, 6.987)                     | (2.972, 4.339, 4.123)                                    | (1.542, 1.423, 1.593)                              | (0.970, 1.617, 1.397)                                       |
| (-15, -4, -6)           | (2, 7, 4)                              | (-15.347, -3.751, -6.367)                 | (2.116, 7.619, 3.472)                                    | (2.045, 1.894, 2.162)                              | (1.009, 2.977, 2.961)                                       |
| (15, -4, -6)            | (2, 7, 4)                              | (14.352, -3.913, -5.930)                  | (2.005, 7.058, 4.202)                                    | (1.708, 1.568, 1.579)                              | (0.825, 2.255, 1.830)                                       |
| (-9, -8, 4)             | (3, 3, 5)                              | (-9.203, -7.712, 3.560)                   | (3.024, 3.637, 4.689)                                    | (1.567, 1.737, 1.919)                              | (1.011, 1.888, 1.167)                                       |
| (-15, -4, 6)            | (2, 7, 4)                              | (-14.975, -3.882, 5.610)                  | (1.888, 6.995, 4.364)                                    | (1.890, 1.528, 1.790)                              | (0.981, 2.478, 2.290)                                       |
| (15, -4, 6)             | (2, 7, 4)                              | (14.601, -3.780, 6.152)                   | (1.761, 6.503, 4.535)                                    | (2.174, 1.919, 1.853)                              | (0.940, 2.714, 2.688)                                       |
| (15, 4, 6)              | (2, 7, 4)                              | (14.818, 4.131, 5.782)                    | (2.169, 6.344, 4.371)                                    | (1.891, 2.127, 1.729)                              | (0.986, 2.706, 2.787)                                       |
| (-9, -8, -4)            | (3, 3, 5)                              | (-9.039, -8.245, -3.967)                  | (2.721, 2.975, 5.219)                                    | (1.641, 1.504, 1.533)                              | (1.989, 2.321, 2.394)                                       |
| (-9, 8, -4)             | (3, 3, 5)                              | (-9.112, 8.124, -4.107)                   | (3.191, 3.364, 4.949)                                    | (1.205, 1.686, 1.434)                              | (1.022, 0.762, 0.598)                                       |
| (-9, -8, 4)             | (3, 3, 5)                              | (-9.203, -7.712, 3.560)                   | (3.024, 3.637, 4.689)                                    | (1.567, 1.737, 1.919)                              | (1.011, 1.888, 1.167)                                       |
| (9, -8, 4)              | (3, 3, 5)                              | (9.699, -7.759, 3.298)                    | (3.104, 2.810, 4.954)                                    | (1.591, 1.361, 1.421)                              | (0.557, 0.782, 0.557)                                       |
| (-9, 8, 4)              | (3, 3, 5)                              | (-9.176, 7.820, 4.318)                    | (2.949, 3.260, 5.068)                                    | (1.440, 1.403, 1.431)                              | (1.157, 1.054, 0.993)                                       |
| (9, 8, 4)               | (3, 3, 5)                              | (9.394, 8.074, 3.907)                     | (2.709, 2.310, 4.487)                                    | (1.693, 1.531, 1.629)                              | (2.403, 2.344, 2.304)                                       |

Table S4: t-statistics for  $P = 3$  attributes

| $(\mu_1, \mu_2, \mu_3)$ | $(\sigma_1^2, \sigma_2^2, \sigma_3^2)$ | t-stat ( $\mu_1$ ) | t-stat ( $\mu_2$ ) | t-stat ( $\mu_3$ ) | t-stat ( $\sigma_1^2$ ) | t-stat ( $\sigma_2^2$ ) | t-stat ( $\sigma_3^2$ ) |
|-------------------------|----------------------------------------|--------------------|--------------------|--------------------|-------------------------|-------------------------|-------------------------|
| (-5, -6, -7)            | (3, 4, 3)                              | -0.030             | -1.024             | 0.342              | -1.293                  | 0.125                   | -1.231                  |
| (5, -6, -7)             | (3, 4, 3)                              | 0.083              | 0.818              | -2.382             | -0.101                  | -0.433                  | 1.185                   |
| (-5, 6, -7)             | (3, 4, 3)                              | -1.221             | 0.156              | 0.955              | 1.222                   | 0.352                   | -1.023                  |
| (-5, -6, 7)             | (3, 4, 3)                              | 0.791              | 0.123              | 0.883              | 0.279                   | -0.544                  | 0.507                   |
| (5, -6, 7)              | (3, 4, 3)                              | -0.984             | 0.347              | 0.310              | -0.614                  | 0.364                   | -1.717                  |
| (5, 6, 7)               | (3, 4, 4)                              | 0.118              | -1.016             | 0.041              | 0.147                   | -1.048                  | -0.442                  |
| (-15, -4, -6)           | (2, 7, 4)                              | -0.848             | 0.657              | -0.849             | -0.572                  | -1.040                  | 0.892                   |
| (15, -4, -6)            | (2, 7, 4)                              | -1.897             | 0.279              | 0.223              | -0.031                  | -0.129                  | -0.552                  |
| (-9, -8, 4)             | (3, 3, 5)                              | 0.648              | -0.829             | 1.146              | 0.121                   | 1.686                   | -1.333                  |
| (-15, -4, 6)            | (2, 7, 4)                              | 0.066              | 0.385              | -1.089             | 0.570                   | 0.010                   | -0.794                  |
| (15, -4, 6)             | (2, 7, 4)                              | -0.917             | 0.573              | 0.409              | 1.273                   | 0.916                   | -0.996                  |
| (15, 4, 6)              | (2, 7, 4)                              | -0.481             | 0.307              | -0.630             | -0.856                  | 1.213                   | -0.666                  |
| (-9, -8, -4)            | (3, 3, 5)                              | 0.118              | 0.814              | -0.107             | -0.702                  | -0.054                  | 0.456                   |
| (-9, 8, -4)             | (3, 3, 5)                              | 0.465              | -0.369             | 0.372              | 0.932                   | 2.392                   | -0.423                  |
| (-9, -8, 4)             | (3, 3, 5)                              | 0.648              | -0.829             | 1.146              | 0.121                   | 1.686                   | -1.333                  |
| (9, -8, 4)              | (3, 3, 5)                              | -2.197             | -0.887             | 2.472              | 0.936                   | -1.215                  | -0.411                  |
| (-9, 8, 4)              | (3, 3, 5)                              | 0.611              | 0.640              | -1.111             | -0.222                  | 1.235                   | 0.342                   |
| (9, 8, 4)               | (3, 3, 5)                              | -1.163             | -0.242             | 0.285              | -0.605                  | -1.472                  | -1.113                  |

Table S5: Numerical Simulations for  $P = 4$  attributes

| $(\mu_1, \mu_2, \mu_3, \mu_4)$ | $(\sigma_1^2, \sigma_2^2, \sigma_3^2, \sigma_4^2)$ |
|--------------------------------|----------------------------------------------------|
| (-5, -14, -3, -2)              | (3,6,4,6)                                          |
| (-10,-12,-5,-5)                | (3,3,3,4)                                          |
| (-7,-5,-5,-3)                  | (4,6,5,4)                                          |
| (5,-14,-3,-5)                  | (3,6,4,6)                                          |
| (-5,14,-3,-5)                  | (3,6,4,6)                                          |
| (-5,-14,-3,5)                  | (3,6,4,6)                                          |
| (5,14,-3,5)                    | (3,6,4,6)                                          |
| (5,-14,3,-5)                   | (3,6,4,6)                                          |
| (5,14,3,5)                     | (3,6,4,6)                                          |
| (10,-12,-5,-5)                 | (3,4,3,4)                                          |
| (-10,12,-5,-5)                 | (3,4,3,4)                                          |
| (-10,-12,5,-5)                 | (3,4,3,4)                                          |
| (-10,-12,-5,5)                 | (3,4,3,4)                                          |
| (10,-12,5,-5)                  | (3,4,3,4)                                          |
| (-10,12,-5,5)                  | (3,4,3,4)                                          |
| (10,12,5,5)                    | (3,4,3,4)                                          |
| (7,-5,-5,-3)                   | (4,6,5,4)                                          |
| (-7,5,-5,-3)                   | (4,6,5,4)                                          |
| (-7,-5,5,-3)                   | (4,6,5,4)                                          |
| (7,-5,5,-3)                    | (4,6,5,4)                                          |
| (-7,5,-5,3)                    | (4,6,5,4)                                          |
| (7,5,5,3)                      | (4,6,5,4)                                          |

Table S6: Numerical Simulations for  $P = 4$  attributes (continued)

| $(\overline{\mu_1}, \overline{\mu_2}, \overline{\mu_3}, \overline{\mu_4})$ | $(\overline{\sigma_1^2}, \overline{\sigma_2^2}, \overline{\sigma_3^2}, \overline{\sigma_4^2})$ |
|----------------------------------------------------------------------------|------------------------------------------------------------------------------------------------|
| (-4.957, -13.727, -3.254, -2.323)                                          | (2.368, 6.014, 3.736, 5.074)                                                                   |
| (-9.651, -11.951, -5.249, -4.794)                                          | (2.753, 3.035, 2.806, 3.984)                                                                   |
| (-7.269, -4.924, -5.028, -3.163)                                           | (3.523, 5.720, 4.367, 3.839)                                                                   |
| (5.088, -14.096, -3.556, -4.840)                                           | (2.437, 5.938, 4.067, 6.112)                                                                   |
| (-5.618, 14.514, -2.732, -4.960)                                           | (2.832, 6.048, 3.760, 5.845)                                                                   |
| (-4.707, -14.606, -2.770, 5.084)                                           | (2.694, 5.589, 4.116, 6.014)                                                                   |
| (-5.120, 14.078, -3.168, 5.304)                                            | (3.410, 5.987, 4.348, 5.793)                                                                   |
| (4.987, -14.345, 3.140, -4.963)                                            | (2.412, 5.604, 3.876, 5.818)                                                                   |
| (5.062, 14.542, 2.360, 5.343)                                              | (2.597, 5.537, 3.947, 5.476)                                                                   |
| (9.624, -11.746, -5.127, -5.109)                                           | (2.659, 4.061, 3.088, 3.973)                                                                   |
| (-10.161, 12.526, -4.934, -5.120)                                          | (3.124, 4.026, 3.069, 4.073)                                                                   |
| (-10.167, -12.214, 4.796, -4.899)                                          | (2.685, 3.774, 3.066, 3.636)                                                                   |
| (-9.792, -11.717, -5.133, 4.834)                                           | (3.243, 4.206, 3.034, 3.243)                                                                   |
| (10.076, -11.867, 5.134, -4.972)                                           | (2.969, 4.024, 2.934, 4.088)                                                                   |
| (-9.833, 12.462, -5.085, 4.123)                                            | (2.964, 3.948, 3.008, 3.934)                                                                   |
| (10.432, 11.902, 5.244, 4.756)                                             | (3.054, 4.280, 2.398, 3.640)                                                                   |
| (7.045, -5.497, -4.710, -3.204)                                            | (4.347, 6.055, 4.975, 3.883)                                                                   |
| (-7.097, 5.174, -5.122, -2.976)                                            | (3.875, 5.943, 4.816, 3.799)                                                                   |
| (-6.715, -5.053, 5.164, -3.247)                                            | (4.037, 6.064, 4.898, 4.066)                                                                   |
| (7.361, -4.920, 4.834, -2.846)                                             | (3.907, 5.966, 5.073, 3.997)                                                                   |
| (-7.234, 4.965, -5.234, 3.456)                                             | (4.026, 5.923, 5.091, 4.172)                                                                   |
| (6.766, 5.419, 5.249, 3.109)                                               | (3.757, 5.210, 4.864, 4.174)                                                                   |

Table S7: Numerical Simulations for  $P = 4$  attributes (continued)

| $(\sigma_{\mu_1}, \sigma_{\mu_2}, \sigma_{\mu_3}, \sigma_{\mu_4})$ | $(\sigma_{\sigma_1^2}, \sigma_{\sigma_2^2}, \sigma_{\sigma_3^2}, \sigma_{\sigma_4^2})$ |
|--------------------------------------------------------------------|----------------------------------------------------------------------------------------|
| (1.956, 1.762, 1.672, 1.712)                                       | (1.231, 1.878, 1.525, 1.599)                                                           |
| (1.938, 1.898, 1.712, 1.827)                                       | (2.301, 2.506, 2.298, 2.501)                                                           |
| (1.652, 1.479, 1.743, 1.574)                                       | (1.845, 2.094, 2.099, 2.007)                                                           |
| (1.595, 1.482, 1.471, 1.601)                                       | (1.593, 0.967, 0.737, 1.153)                                                           |
| (1.277, 1.576, 1.337, 1.517)                                       | (1.365, 0.934, 0.749, 0.565)                                                           |
| (1.382, 1.612, 1.570, 1.670)                                       | (0.914, 1.146, 0.939, 0.492)                                                           |
| (1.707, 1.542, 1.451, 1.287)                                       | (1.502, 0.906, 1.061, 0.875)                                                           |
| (1.440, 1.811, 1.365, 1.349)                                       | (1.132, 0.789, 0.786, 0.724)                                                           |
| (1.380, 1.726, 1.839, 1.850)                                       | (1.822, 2.091, 2.155, 2.075)                                                           |
| (1.372, 1.680, 1.645, 1.379)                                       | (1.313, 0.848, 1.171, 0.761)                                                           |
| (1.588, 1.542, 1.434, 1.666)                                       | (0.740, 0.549, 0.887, 0.660)                                                           |
| (1.805, 1.776, 1.723, 1.866)                                       | (1.928, 2.108, 2.050, 2.163)                                                           |
| (1.798, 1.769, 1.545, 1.692)                                       | (1.936, 1.835, 1.826, 1.678)                                                           |
| (1.656, 1.866, 1.496, 1.623)                                       | (0.502, 0.479, 0.235, 0.294)                                                           |
| (1.564, 1.680, 1.755, 1.518)                                       | (0.780, 0.575, 0.763, 0.775)                                                           |
| (1.753, 1.815, 1.588, 1.806)                                       | (2.352, 2.435, 2.215, 2.432)                                                           |
| (1.138, 1.449, 1.528, 1.654)                                       | (1.340, 0.880, 1.124, 1.040)                                                           |
| (1.519, 1.793, 1.945, 1.562)                                       | (1.009, 0.880, 0.857, 0.854)                                                           |
| (1.681, 1.850, 1.458, 1.728)                                       | (0.469, 0.898, 0.277, 0.689)                                                           |
| (1.294, 1.450, 1.624, 1.433)                                       | (0.657, 0.267, 0.215, 0.528)                                                           |
| (1.376, 1.826, 1.736, 1.493)                                       | (1.185, 0.630, 0.966, 0.527)                                                           |
| (1.590, 1.671, 1.557, 1.679)                                       | (1.903, 2.122, 2.165, 2.243)                                                           |

Table S8: Numerical Simulations for  $P = 4$  attributes (continued)

| t-stat ( $\mu_1$ ) | t-stat ( $\mu_2$ ) | t-stat ( $\mu_3$ ) | t-stat ( $\mu_4$ ) |
|--------------------|--------------------|--------------------|--------------------|
| 0.111              | 0.774              | -0.758             | -0.942             |
| 0.899              | 0.129              | -0.727             | 0.563              |
| -0.813             | 0.257              | -0.079             | -0.519             |
| 0.276              | -0.325             | -1.891             | 0.500              |
| -2.419             | 1.631              | 1.003              | 0.132              |
| 1.060              | -1.881             | 0.731              | 0.250              |
| -0.351             | 0.254              | -0.580             | 1.180              |
| -0.045             | -0.951             | 0.513              | 0.138              |
| 0.225              | 1.570              | -1.740             | 0.928              |
| -1.370             | 0.756              | -0.387             | -0.396             |
| -0.508             | 1.705              | 0.231              | -0.360             |
| -0.463             | -0.603             | -0.591             | 0.272              |
| 0.580              | 0.799              | -0.431             | -0.491             |
| 0.230              | 0.356              | 0.449              | 0.085              |
| 0.534              | 1.375              | -0.241             | -2.889             |
| 1.233              | -0.269             | 0.768              | -0.675             |
| 0.199              | -1.713             | 0.949              | -0.616             |
| -0.320             | 0.486              | -0.313             | 0.078              |
| 0.848              | -0.144             | 0.562              | -0.715             |
| 1.394              | 0.274              | -0.512             | 0.538              |
| -0.849             | -0.097             | -0.674             | 1.526              |
| -0.737             | 1.255              | 0.801              | 0.324              |



Table S9: Numerical Simulations for  $P = 4$  attributes (continued)

| t-stat ( $\sigma_1^2$ ) | t-stat ( $\sigma_2^2$ ) | t-stat ( $\sigma_3^2$ ) | t-stat ( $\sigma_4^2$ ) |
|-------------------------|-------------------------|-------------------------|-------------------------|
| 2.568                   | -0.038                  | 0.866                   | 2.897                   |
| 0.537                   | -0.070                  | 0.421                   | 0.032                   |
| 1.294                   | 0.668                   | 1.508                   | 0.400                   |
| 1.768                   | 0.324                   | -0.452                  | -0.485                  |
| 0.615                   | -0.255                  | 1.606                   | 1.372                   |
| 1.675                   | 1.792                   | -0.616                  | -0.147                  |
| -1.366                  | 0.070                   | -1.639                  | 1.183                   |
| 2.597                   | 2.513                   | 0.790                   | 1.255                   |
| 1.107                   | 1.106                   | 0.124                   | 1.262                   |
| 1.300                   | -0.359                  | -0.376                  | 0.175                   |
| -0.841                  | -0.236                  | -0.388                  | -0.555                  |
| 0.817                   | 0.537                   | -0.160                  | 0.841                   |
| -0.627                  | -0.560                  | -0.094                  | 2.255                   |
| 0.306                   | -0.248                  | 1.405                   | -1.490                  |
| 0.229                   | 0.455                   | -0.054                  | 0.425                   |
| -0.115                  | -0.576                  | 1.360                   | 0.741                   |
| -1.294                  | -0.310                  | 0.112                   | 0.563                   |
| 0.622                   | 0.326                   | 1.072                   | 1.177                   |
| -0.392                  | -0.354                  | 1.841                   | -0.481                  |
| 0.708                   | 0.628                   | -1.689                  | 0.028                   |
| -0.108                  | 0.608                   | -0.471                  | -1.629                  |
| 0.638                   | 1.860                   | 0.314                   | -0.388                  |

## **2 Statistically Significant Regression Results**

In this section, we present our statistically significant regression results. Point estimates largest in magnitude are presented in Figures 2-4 of the manuscript.

Table S10:  $\mu_p$  Estimates from Equations 22-23 Estimated via MML

|                                | 2.5th Percentile | 50th Percentile | 97.5th Percentile |
|--------------------------------|------------------|-----------------|-------------------|
| Intercept                      | 0.023            | 2.001           | 4.795             |
| Election Year 2008             | -2.041           | -1.082          | -0.120            |
| Arkansas                       | 0.287            | 2.336           | 6.201             |
| Illinois                       | 0.021            | 1.604           | 3.666             |
| Maine                          | 0.410            | 2.601           | 6.606             |
| Michigan                       | 0.040            | 1.448           | 3.263             |
| Minnesota                      | 0.124            | 2.821           | 5.047             |
| Wisconsin                      | 0.694            | 2.506           | 5.561             |
| Black                          | 3.065            | 5.263           | 8.495             |
| Latinx                         | 0.622            | 1.684           | 3.514             |
| Other                          | 0.022            | 1.218           | 2.433             |
| 20-40K                         | -5.975           | -3.053          | -0.646            |
| Age 30-44                      | -8.496           | -6.586          | -2.798            |
| Age 45-64                      | -4.119           | -2.447          | -0.360            |
| Age 65+                        | 0.007            | 0.665           | 2.088             |
| HS                             | -8.829           | -6.053          | -3.490            |
| Some College                   | -3.908           | -2.644          | -0.826            |
| Post-Grad                      | -3.326           | -1.630          | -0.237            |
| Married                        | 0.262            | 1.935           | 4.575             |
| Kids                           | 0.421            | 1.964           | 4.584             |
| Whites, \$20-40k               | -4.186           | -1.834          | -0.155            |
| Whites, \$40-75k               | 0.113            | 1.932           | 3.999             |
| Latinx, \$0-20k                | -6.587           | -3.090          | -0.026            |
| Other, \$0-20K                 | -8.232           | -2.867          | -0.391            |
| District of Columbia, \$40-75k | 0.335            | 2.168           | 4.002             |
| Maine, \$40-75k                | 0.292            | 1.683           | 4.414             |
| Mississippi, >\$150k           | 0.163            | 1.388           | 4.427             |
| Arizona, Black                 | 0.248            | 3.044           | 8.414             |
| Michigan, Black                | 0.486            | 3.476           | 7.688             |
| Pennsylvania, Black            | 0.596            | 3.304           | 7.065             |
| South Dakota, Black            | 0.257            | 2.348           | 5.676             |
| Virginia, Black                | 0.040            | 3.287           | 8.649             |
| Arizona, Latinx                | 0.026            | 1.588           | 3.679             |
| New Mexico, Latinx             | 0.070            | 1.485           | 6.230             |
| Virginia, Latinx               | 0.354            | 2.093           | 4.889             |
| Alabama, Other                 | 0.721            | 2.731           | 6.808             |
| Texas, Other                   | 0.286            | 1.733           | 3.689             |
| Utah, Other                    | 0.160            | 2.590           | 15.482            |

Table S11:  $\sigma_p^2$  Estimates from Equations 22-23 Estimated via MML

|                                | 2.5th Percentile | 50th Percentile | 97.5th Percentile |
|--------------------------------|------------------|-----------------|-------------------|
| Intercept                      | 0.355            | 2.145           | 6.988             |
| Election Year 2008             | 0.135            | 0.670           | 3.561             |
| Arkansas                       | 3.518            | 9.421           | 17.676            |
| Illinois                       | 4.157            | 4.348           | 10.199            |
| Maine                          | 1.510            | 3.549           | 4.543             |
| Michigan                       | 0.390            | 1.829           | 6.889             |
| Minnesota                      | 0.024            | 1.526           | 11.136            |
| Wisconsin                      | 0.271            | 0.360           | 0.651             |
| Black                          | 0.049            | 0.149           | 0.218             |
| Latinx                         | 0.317            | 0.393           | 0.598             |
| Other                          | 0.005            | 0.770           | 1.347             |
| 20-40K                         | 0.168            | 1.809           | 2.824             |
| Age 30-44                      | 4.081            | 13.496          | 33.255            |
| Age 45-64                      | 7.197            | 14.330          | 24.708            |
| Age 65+                        | 0.249            | 0.531           | 4.020             |
| HS                             | 3.580            | 26.479          | 83.324            |
| Some College                   | 1.472            | 9.257           | 19.374            |
| Post-Grad                      | 0.437            | 3.682           | 6.068             |
| Married                        | 0.140            | 0.190           | 3.947             |
| Kids                           | 0.022            | 0.476           | 0.969             |
| Whites, \$20-40k               | 0.085            | 0.227           | 0.347             |
| Whites, \$40-75k               | 0.166            | 0.256           | 0.412             |
| Latinx, \$0-20k                | 0.011            | 0.895           | 63.421            |
| Other, \$0-20k                 | 0.082            | 4.006           | 6.680             |
| District of Columbia, \$40-75k | 0.027            | 0.435           | 0.457             |
| Maine, \$40-75k                | 1.141            | 2.974           | 7.380             |
| Mississippi, >\$150k           | 0.226            | 2.304           | 4.628             |
| Arizona, Black                 | 0.101            | 1.589           | 2.470             |
| Michigan, Black                | 0.740            | 1.566           | 28.776            |
| Pennsylvania, Black            | 0.001            | 0.482           | 0.907             |
| South Dakota, Black            | 0.921            | 1.074           | 1.576             |
| Virginia, Black                | 0.276            | 0.361           | 1.759             |
| Arizona, Latinx                | 0.079            | 2.616           | 3.014             |
| New Mexico, Latinx             | 0.962            | 8.287           | 63.628            |
| Virginia, Latinx               | 0.097            | 0.318           | 0.733             |
| Alabama, Other                 | 0.757            | 4.064           | 17.419            |
| Texas, Other                   | 5.156            | 6.403           | 12.933            |
| Utah, Other                    | 0.014            | 2.326           | 3.500             |

## References

- [1] Kevin Dayaratna. *Contributions to Bayesian Statistical Modeling in Public Policy Research*. PhD thesis, University of Maryland, 2014.
